# Supplementary material
Source: PubMed Central journal article supplement (PMC404326)
Supplement: 7600206s1.pdf [file 7600206s1.pdf]

**17** **33** **35** **37** **38**  
*humART* 1 MSSFEGQMAEYPTISIDRF-DRENLRA-RAYFLSHCHKDHMKGLRAPTLKRRLECSLKVY 58  
*muART* 1 MSSFQGMAYEYPTISIDRF-DRENLKA-RAYFLSHCHKDHMKGLRAPSLKRRLECSLKVF 58  
*ratART* 1 MSSFQGMAYEYPTISIDRF-DRENLKA-RAYFLSHCHKDHMKGLRAPSMKRRLECSLKVF 58  
*humSNM1* 699 TCFYKPIPG-TGFTVDAF-QYGVVEGCTAYFLTHFHSDDHYAGLSKH-FTF----P---- 748  
*muSNM1* 682 TCFYKRI PG-TGFTVDAF-QYGEIEGCTAYFLTHFHSDDHYAGLSKD-FTR----P---- 730  
*humSNM1B* 1 MNGVL--IPH-TPIAVD-FWSLRRAGTARLFFLSHMHSDHTVGLSST-WAR----P---- 47  
*muSNM1B* 1 MNGVV--IPQ-TPIAVD-FWSLRRAGSARLFFLTHMHCDHTVGLSST-WAR----P---- 47  
*scSNM1* 229 VVDGF 233 246 LSHHSDHYI 255  
*smL1* 72 LLDGG 76 103 LSHAHADHAG 112

**115**  
*humART* 59 LYCSPVTKELLTSPKYRFWKRIISIEIETPTQISL-VDEASGEKEEIVVTLTPAGHCP 117  
*muART* 59 LYCSPVTKELLTSPKYRFWENRIITIEIETPTQISL-VDEASGEKEEVVVTLTPAGHCP 117  
*ratART* 59 LYCSPVTKELLTSPKYRFWENRIIAIEIETPTQVSL-VDEASGEKEEVVVTLTPAGHCP 117  
*humSNM1* 749 VYCSEITGN-LLKN-KLHVQEYIHLPL--DTEC-I-VNGV---K--V-V-LLDANHCP 795  
*muSNM1* 731 VYCSEITGN-LLKK-KLRVQEYIRQLPM--DTEC-V-VDSV---K--V-V-FVDANHCP 778  
*humSNM1B* 48 LYCSPITAH-LLHR-HLQVSKQWIALEVG-ESHV-LPLDEIG--QETMTVTLLDANHCP 101  
*muSNM1B* 48 LYCSPITAC-LLHR-RLQVSKHWIRALEVG-ESHV-LPLDEIG--QETMTVTLLDANHCP 101  
*scSNM1* 316 ANHCP 320  
*smL1* 179 AGHTP 183

**136** **165**  
*humART* 118 GSVMF LFQGNNGT-VLYTGFRLAQGEAARMELLSHGGRVKDIQSVYDITTFCDPRFYQI 176  
*muART* 118 GSVMF LFQGSNGT-VLYTGFRLAKGEASRMELLSHGGRVKDIQSVYDITTFCDPRFYQI 176  
*ratART* 118 GSVMF LFQGSNGT-VLYTGFRLAKGEVSRMELLSHGGRVKDIQSVYDITTFCDPRFYQI 176  
*humSNM1* 796 GAVML LFYLPNGTIVLHTGDFRAD-PSMER-SLLA-D---QKVHMLYDITTYCSPEY-TF 848  
*muSNM1* 779 GATML LFQLPNGAVILHTGDFRAD-PSMER-SRLA-G---RKVHTLFDITTYCSPEY-TF 831  
*humSNM1B* 102 GSVMF LFEGYFGT-ILYTGFRTY-PSMLKEPALTLG---KQIHTLYDNTNCPAL-VL 155  
*muSNM1B* 102 GSVMF LFEGYFGT-ILYTGFRTY-PSMLKEPALILG---KQIHTLYDNTNCPAL-VL 155  
*scSNM1* 345 TGDFR 349 374 YLDTT 378  
*smL1* 203 YADSL 207

*humART* 177 PSREELCS-GV-LELVRSWITRS PYHVWLNCKAAAYGYEYLFN--L-SEE-L----GVQ 226  
*muART* 177 PSREQCLR-GI-LELVRSWITRS PHHVWLNCKAAAYGYEYLFN--L-SEE-L----GVQ 226  
*ratART* 177 PSREQCLR-GV-LELVRSWITRS PKHVWLNCKAAAYGYEYLFN--L-SEE-L----GVQ 226  
*humSNM1* 849 PSQQEVIRFAINTAFEAV--TLNPHALV-V-C-GTYSIG-K-EKVFLAIADVLGSKVGM 901  
*muSNM1* 832 PSQQEVIQFAINTAFEAV--TLNPHALV-V-C-GTYCIG-K-EKVFLAIADVLGSKVGM 884  
*humSNM1B* 156 PSRQEAH-QI-VQLIR---KHPQHNIK-I---GLYSLG-K-ES--L-LEQ-L----AL- 195  
*muSNM1B* 156 PSRQEASQ-QI-VQLIR---QFPQHNIK-I---GLYSLG-K-ES--L-LEQ-L----AL- 195  
*scSNM1*  
*smL1*

*humART* 227 VH-VNKLDMFRNMPDILHHLTT-DR-NTQIHACRHPKAEYFQ-WS-KLP-CGITSRNRI 280  
*muART* 227 VH-VDKLDMFKNMPDILHHLTT-DR-NTQIHACRHPKAEFCFQ-WN-KLP-CGITSQNK 280  
*ratART* 227 VH-VDKLDMFKNMPDILHHLTT-DR-NTQIHACRHPKAEYFQ-WN-KLP-CGMASKTKT 280  
*humSNM1* 902 QEKYKTLQCL-NIPE-INSLITDMCSSLVHLLPMMQ-IN-FKGLQSHLKKCG--GKYNQ 955  
*muSNM1* 885 QEKYKTLQCL-NIPE-VSSLITDMCDSLHLLPMMQ-IN-FKGLQSHLKKCG--GKYDQ 938  
*humSNM1B* 196 -E-FQTWVVL-SPRR-LE-LV--QL-LGLADVFTVEEKAGRIHAVD-HMEIC----H-SN 241  
*muSNM1B* 196 -E-FRTWVVL-SPQR-LE-LV--QL-LGLADVFTVEEAGRIHAVD-HTEIC----H-SA 241  
*scSNM1*  
*smL1*

**319**  
*humART* 281 PLHISIKPSTMW-FGERSRKT-NVI--VRT-GESSYRACFSFHSYSEIKDFLSYICPV 335  
*muART* 281 ALHTISIKPSTMW-FGERTRKT-NVI--VRT-GESSYRACFSFHSFSEIKDFLSYICPV 335  
*ratART* 281 VLHTISIKPSTMW-FGERTRKT-NVI--VRT-GESSYRACFSFHSYSEIKDFLSYICPV 335  
*humSNM1* 956 ILA---FRPTG-WTHSNKFTRIADVI PQTKG-NISYIGIPYSEHSYLEMKRFVQWLKPK 1010  
*muSNM1* 939 ILA---FRPTG-WTHSNNTSTADII PQTRG-NISYIGIPYSEHSYLEMKRFVQWLKPK 993  
*humSNM1B* 242 ML-----R----WNQTHPTTAILPSTRKIHSSHPDIHVIPYSDHSYSELRAFVAALKPC 292  
*muSNM1B* 242 ML-----Q----WNQSHPTAIFPSTRKVRSPHPSIYTPYSDHSYSELRAFVAALRPC 292  
*scSNM1* 609 SEHSS 613  
*smL1* 244 TPEFG 248

*humART* 336 NAYPNVI--PVGT-TMDKVVEILKP-LCRSSQSTEPKYK 370  
*muART* 336 NVYPNVI--PVGL-TVDKVMDFLKP-LCRSPQ-SVPKYK 370  
*ratART* 336 NAYPNVI--PIGL-TVDKVMDFLKP-LCRSSQCAEPKYK 370  
*humSNM1* 1011 KIIPTVN---VGT-WKSR-ST-MEK-YFREWK-LEAGY- 1040  
*muSNM1* 994 KIIPTVN---VGS-FRSR-NT-MEK-YFKEWR-LEAGY- 1023  
*humSNM1B* 293 QVVPIVSRRPCGG-FQDSLSPRISVPLIPD-S-VQQ-Y- 326  
*muSNM1B* 293 QVVPIVHQKPCGEFFQDSLSPRLAMPLIPH-S-VQQ-Y- 327  
*scSNM1*  
*smL1*

### **Figure Sup\_1. The Human ARTEMIS Protein**

Conserved Residues in the Metallo- $\beta$ -lactamase/ $\beta$ -CASP Domain of ARTEMIS and Related Proteins. GenBank accession numbers of the sequences used were NM\_022487 for human (hum) ARTEMIS, BAC34960 for murine (mu) ARTEMIS, AAM89124 for rat ARTEMIS, NM\_014881 for human SNM1, AAF64472 for murine SNM1, NM\_022836 for human SNM1B, BAC33550 for murine SNM1B, P30620 for yeast (sc) SNM1 and AJ251815 for *Stenotrophomonas maltophilia* (sm) L1. Highly conserved residues chosen for mutagenesis are indicated by black boxes. The numbering of mutagenized amino acids refers to positions in the human ARTEMIS protein (also see Callebaut et al. 2002).
