# Supplementary material
Source: PubMed Central journal article supplement (PMC404326)
Supplement: 7600206s4.pdf [file 7600206s4.pdf]

#### **Figure Sup\_4. Sequence Analysis of V(D)J Recombination Coding Joints**

V(D)J recombination assays were performed in ARTEMIS-positive and ARTEMIS-deficient human primary dermal fibroblasts either omitting expression plasmids for wild-type ARTEMIS (-ART) or adding expression plasmids for wild-type ARTEMIS, ARM11, ARM12, ARM13 or ARM19, respectively. As controls assays, RAG2 was omitted (-RAG2). Coding joints of recombined substrate plasmids were PCR amplified, cloned and sequenced. The depicted sequences refer to experiment 2 in Table I. *P* Palindromic Sequences. Sequences comprising microhomologies are underlined.
